# Supplementary material for: Clinical features of biliary tract cancer in Japanese individuals with Lynch syndrome
Source: PubMed Central journal article supplement — J Gastrointest Oncol. 2022 Oct;13(5):2532–8. doi: 10.21037/jgo-22-165 (PMC9660066; doi:10.21037/jgo-22-165), 2022-10
Supplement: jgo-13-05-2532-dss.pdf [file jgo-13-05-2532-dss.pdf]

## Data Sharing Statement

|                     |                                                                                                                                                     |                                                                                                   |
|---------------------|-----------------------------------------------------------------------------------------------------------------------------------------------------|---------------------------------------------------------------------------------------------------|
| <b>Article Info</b> | https://dx.doi.org/10.21037/jgo-22-165                                                                                                              |                                                                                                   |
| <b>Item</b>         | <b>Question</b>                                                                                                                                     | <b>Authors' Response<br/>(place "-" if not applicable)</b>                                        |
| 1                   | Would you like to share data collected for your study to others?                                                                                    | Yes                                                                                               |
| 2                   | If not, would you like to share the reason for your decision?                                                                                       | -                                                                                                 |
| 3                   | What data in particular will be shared?                                                                                                             | Cumulative risk of BTC development in particular will be shared.                                  |
| 4                   | Any other documents will be shared? Such as study protocol, statistical analysis plan, informed consent form, clinical study report, analytic code. | -                                                                                                 |
| 5                   | When will data availability begin?                                                                                                                  | From the publication date                                                                         |
| 6                   | When will data availability end?                                                                                                                    | Two years within the publication date, since the clinical data may be updated over time           |
| 7                   | To whom will you share the data?                                                                                                                    | Medical oncologists and breast surgeons who are interested in studies of Lynch syndrome           |
| 8                   | For what type of analysis or purpose?                                                                                                               | Clinical information to identify the feature of Lynch syndrome associated biliary tract cancer.   |
| 9                   | How or where can the data/documents be obtained?                                                                                                    | E- mails could be sent to the address below to obtain the shared data:<br>nkanaya@bwh.harvard.edu |
| 10                  | Any other restrictions?                                                                                                                             | -                                                                                                 |
