# Supplementary material for: Clinical features of biliary tract cancer in Japanese individuals with Lynch syndrome
Source: PubMed Central journal article supplement — J Gastrointest Oncol. 2022 Oct;13(5):2532–8. doi: 10.21037/jgo-22-165 (PMC9660066; doi:10.21037/jgo-22-165), 2022-10
Supplement: jgo-13-05-2532-supplementary.pdf [file jgo-13-05-2532-supplementary.pdf]

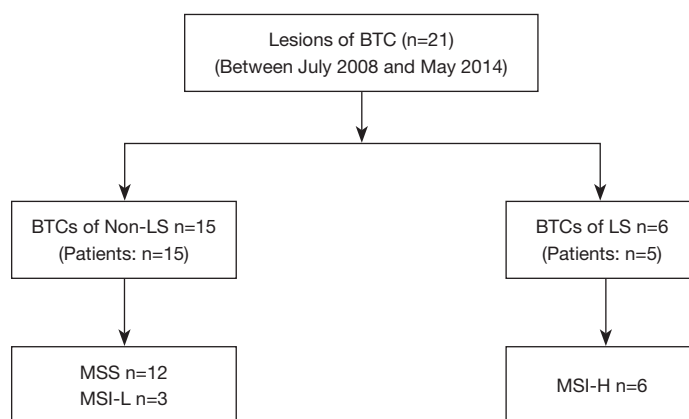

**Figure S1** Flow diagram for MSI testing of BTC. BTC, biliary tract cancer; LS, Lynch syndrome; MSS, microsatellite stable; MSI-L, low-frequency of microsatellite instability; MSI-H, high-frequency of microsatellite instability; MSI, microsatellite instability.
